# Supplementary material for: Re-shifting the ecological baseline for the overexploited Mediterranean red coral
Source: PubMed Central journal article supplement (PMC5309836; doi:10.1038/srep42404), 2017-02-15
Supplement: srep42404-s1.pdf [file srep42404-s1.pdf]

## Re-shifting the ecological baseline for overexploited Mediterranean red coral

Authors: Garrabou J<sup>1,2</sup>, Sala E<sup>3</sup>, Linares C<sup>4</sup>, Ledoux JB<sup>1,5</sup>, Montero I<sup>4</sup>, Dominici JM<sup>6</sup>, Kipson S<sup>7</sup>, Teixidó N<sup>1,8</sup>, Cebrian E<sup>9,10</sup>, Kersting DK<sup>4</sup>, Harmelin JG<sup>2</sup>

### Extended data Figures

Extended data Figure 1. Map of the Northwestern Mediterranean with the geographic position of the Cave b population (red dot) and the protected (black dots) and unprotected (white dots) locations of red coral populations that were included in the analysis (see Supplementary Table 1 and 2 providing the main features of populations). Maps was generated with marmap package v. 0.9.5 in R environment v. 3.3.0 (<http://www.R-project.org/>)<sup>1</sup>

Extended data Figure 2. Size structure height (cm) of the Cave b population obtained from the measurements of the maximum height of the colonies found in 23 (20 x 20 cm) quadrats.

### Supplementary Tables

Supplementary Table 1. This file contains information on the population structure (density, size and biomass) for the Cave b population and for protected and unprotected populations reported in the literature.

Supplementary Table 2. This file contains information on the geographic position, depth range, sampling year, habitat, level and year of protection for the populations considered in this study.

<sup>1</sup> References to be included in the references list if needed

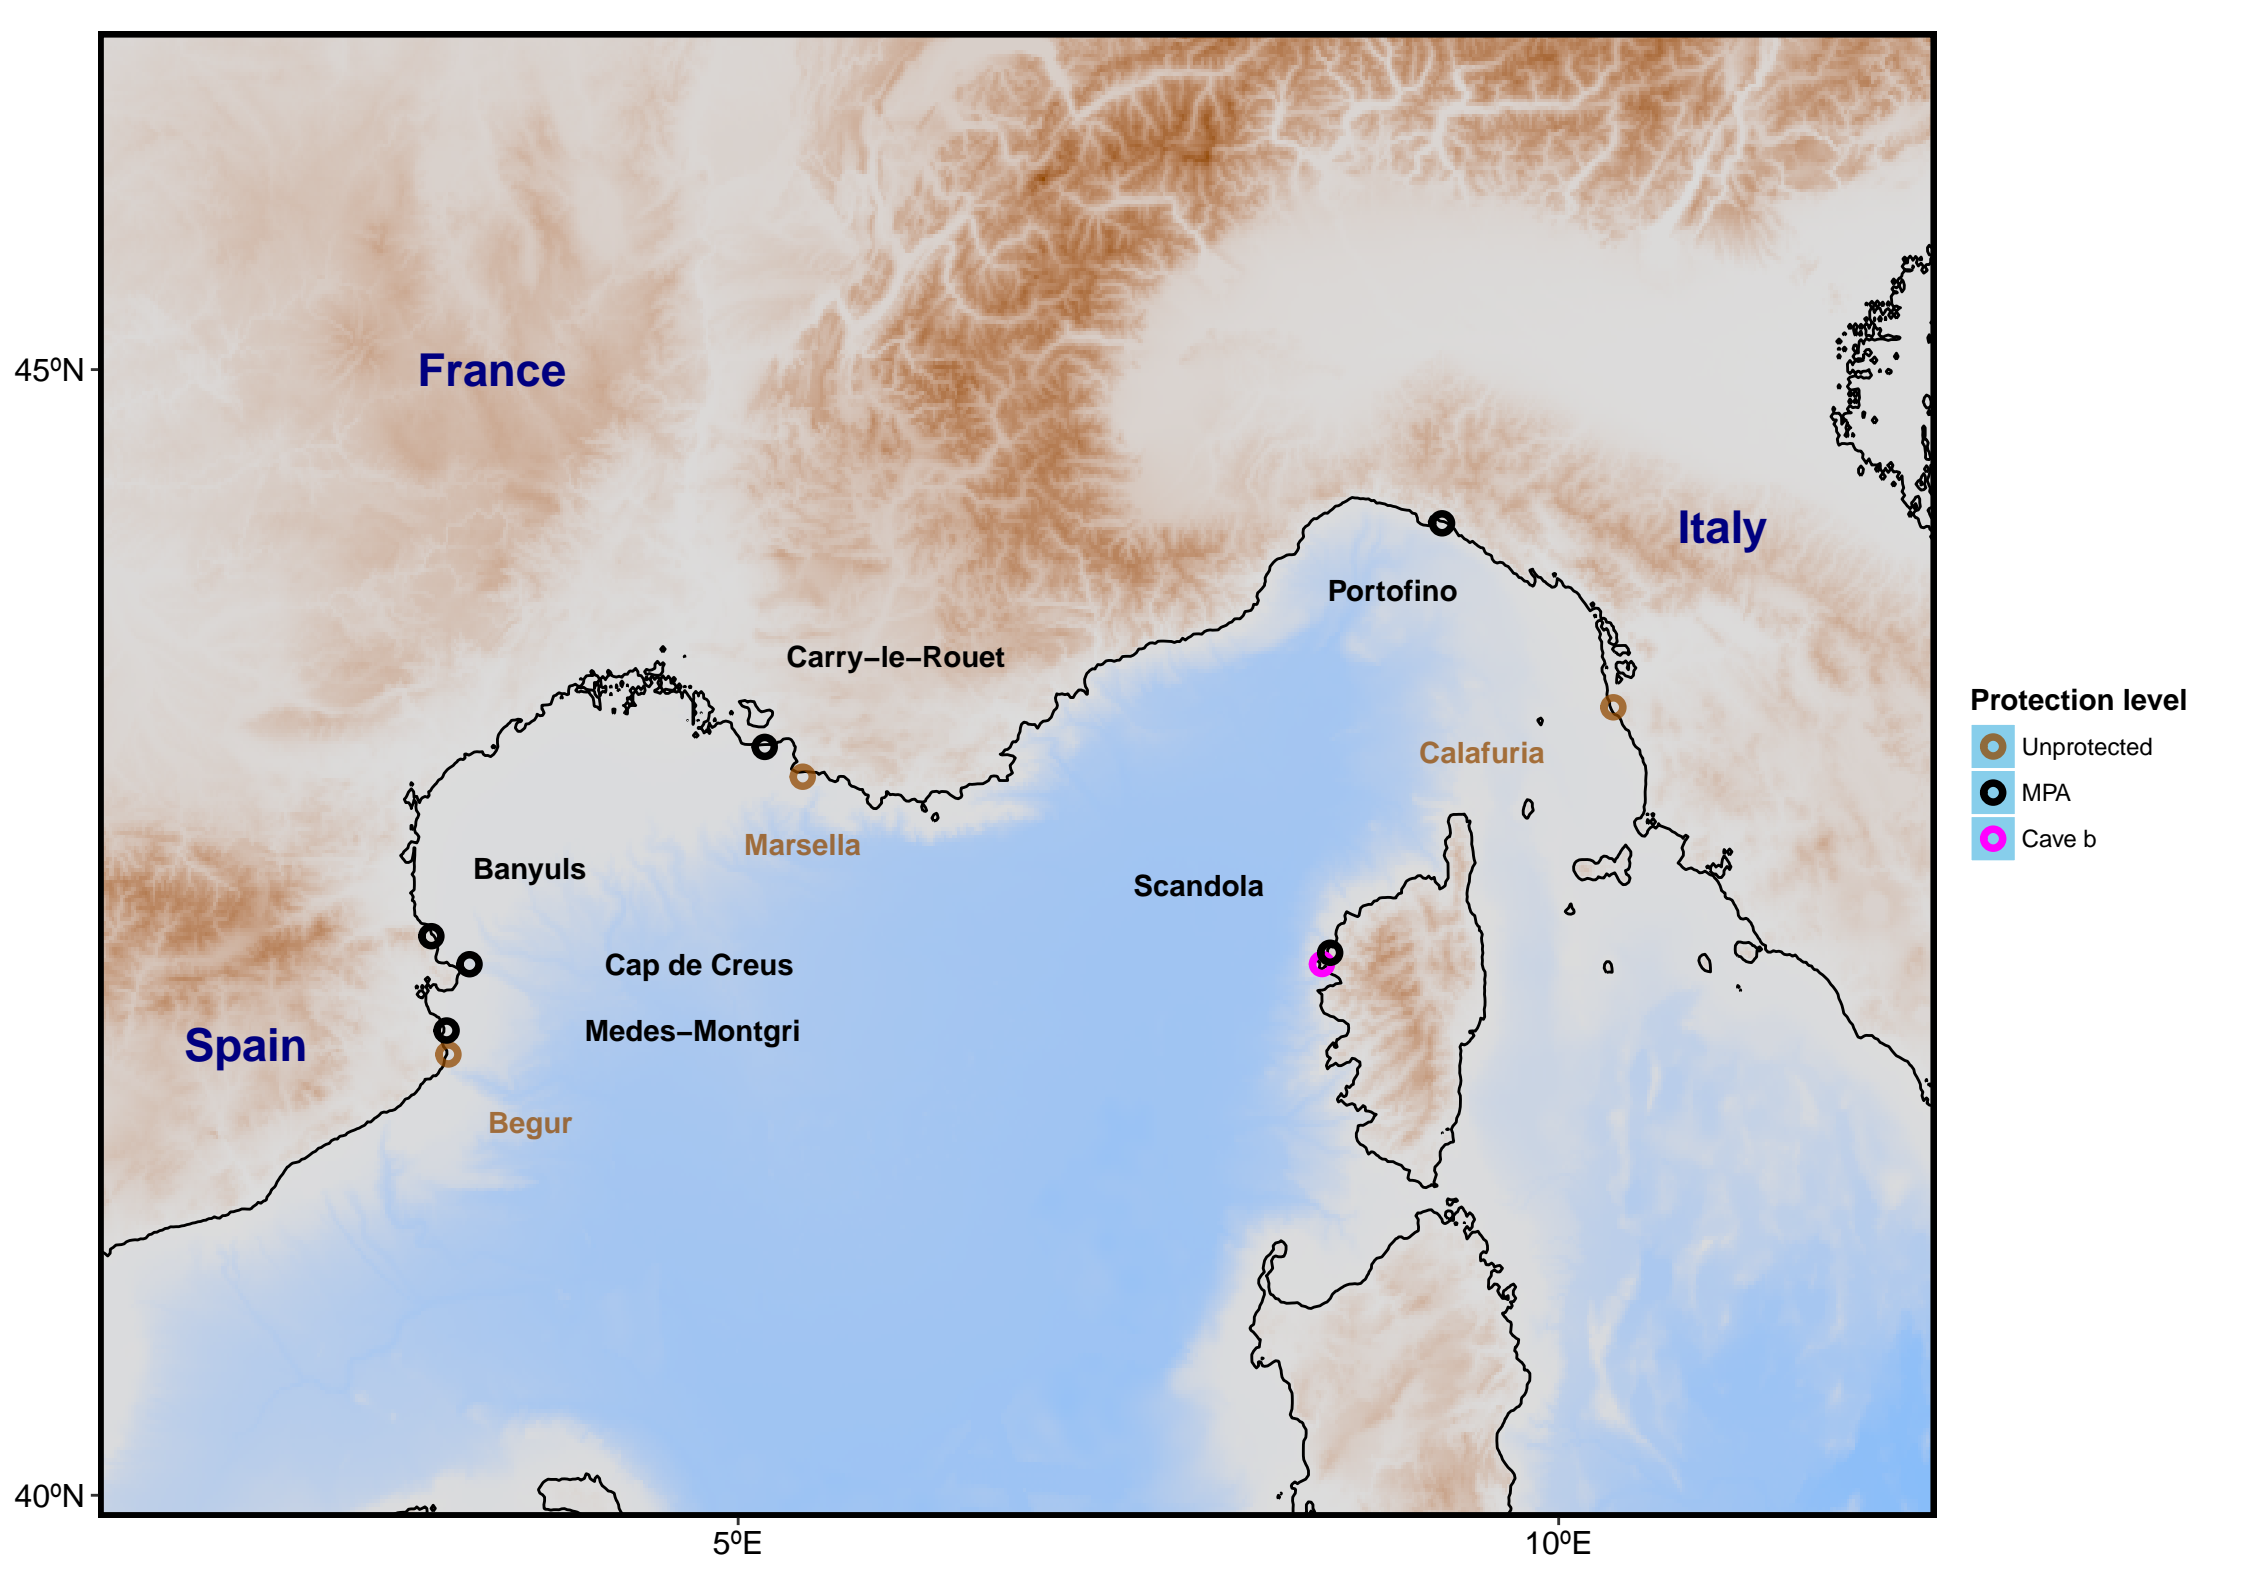

# Cave b

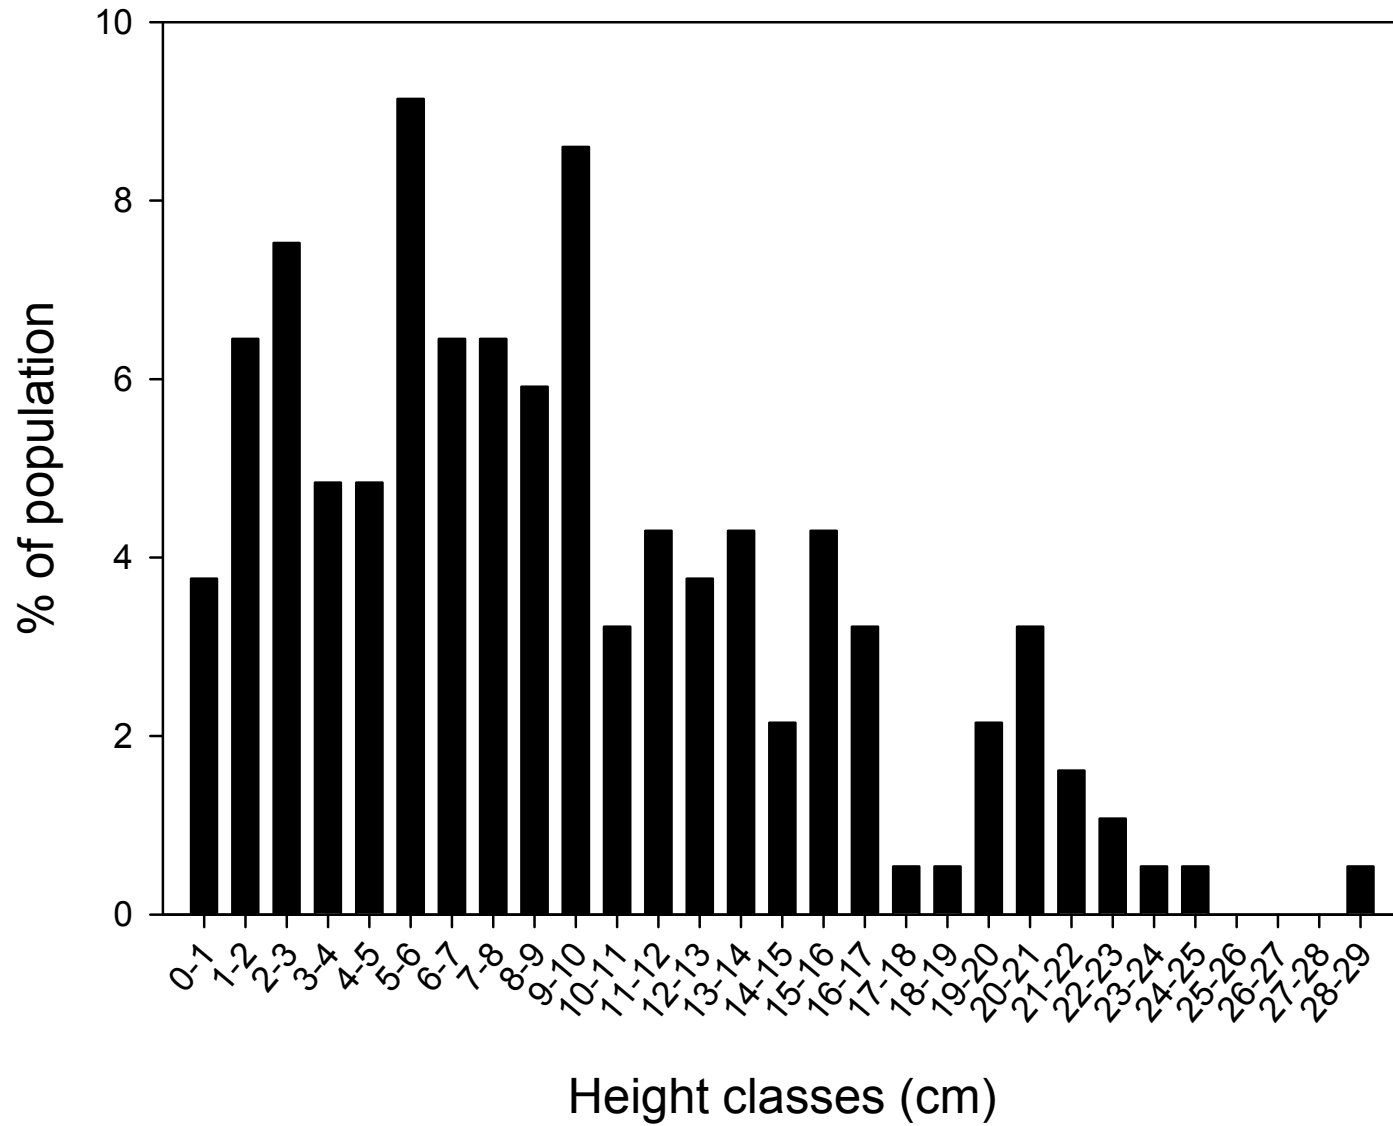

| ID | Population           | N (col) | Density (col m <sup>-2</sup> ) | Biomass (g m <sup>-2</sup> ) | Height (cm) |     |            | Diameter (mm) |     |            | Large colonies   |                   | Biomass (g m <sup>-2</sup> ) | Reference  |
|----|----------------------|---------|--------------------------------|------------------------------|-------------|-----|------------|---------------|-----|------------|------------------|-------------------|------------------------------|------------|
|    |                      |         |                                |                              | Mean        | SD  | Min-Max    | Mean          | SD  | Min-Max    | % > 10 cm height | % > 7 mm diameter |                              |            |
| 1  | Cave b               | 185     | 201,0                          | 3427,4                       | 9,4         | 5,8 | 0,5-28,0   | -             | -   | -          | 44,3             | -                 | 2883,5                       | This study |
| 2  | Portofino            | 143     | 992,5                          | 2251,8                       | -           | -   | -          | 4,4           | 1,7 | na-14,5    | -                | 8,7               | 880,0                        | 30         |
| 3  | Banyuls              | 109     | 137,0                          | 1164,1                       | 6,7         | 3,8 | 0,9-16,6   | -             | -   | -          | 20,0             | -                 | 650,6                        | 33         |
| 4  | Carry-le-Rouet       | 89      | 47,0                           | 523,4                        | 7,4         | 4,7 | 0,6-15,3   | -             | -   | -          | 38,0             | -                 | 397,4                        | 33         |
| 5  | Palazzu              | 166     | 70,0                           | 629,2                        | 6,7         | 4,2 | 0,4-16,9   | 8,9           | 5,8 | na-29,7    | 24,9             | 54,2              | 385,1                        | 33         |
| 6  | Cap de Creus         | 477     | 297,5                          | 477,3                        | -           | -   | -          | 4,1           | 1,2 | na - 11,5  | -                | 9,0               | 133,2                        | 30         |
| 7  | Medes shallow        | 819     | 184,4                          | 554,5                        | 4,2         | 2,6 | 0 - 19,0   | 6,9           | 2,4 | 2,0 - 30,0 | 2,6              | 48,4              | 105,2                        | 29         |
| 8  | Tres Frares          | NA      | 45,0                           | 335,2                        | 5,7         | 2,9 | 1,4 - 13,5 | 7,0           | 4,0 | 3,0 - 21,0 | 11,3             | 43,7              | 96,9                         | 5          |
| 9  | Figuier Exterior     | 331     | 606,6                          | 1555,0                       | 3,8         | 1,7 | 0,2-10,0   | -             | -   | -          | 0,6              | -                 | 53,0                         | 12         |
| 10 | Pedres Barra Massin: | NA      | 42,0                           | 232,5                        | 5,5         | 2,6 | 1,9 - 15,5 | 9,0           | 4,0 | 4,0- 22,0  | 3,7              | 58,5              | 39,8                         | 5          |
| 11 | Medes deep           | 819     | 58,9                           | 177,1                        | 4,2         | 2,6 | 0 - 19,0   | 6,9           | 2,4 | 2,0 - 30,0 | 2,6              | 48,4              | 33,6                         | 29         |
| 12 | Moyade Exterior      | 137     | 227,9                          | 326,6                        | 2,7         | 1,6 | 0,3-10,0   | -             | -   | -          | 0,7              | -                 | 24,1                         | 12         |
| 13 | Calafuria            | 4408    | 1300,0                         | 201,5                        | -           | -   | -          | 1,3           | 1,0 | 0,0-8,0    | -                | 0,3               | 23,2                         | 31         |
| 14 | Moyade Interior      | 196     | 275,7                          | 138,7                        | 1,6         | 0,9 | 0,2-10,0   | -             | -   | -          | 0,5              | -                 | 19,9                         | 12         |
| 15 | Montgrí              | 695     | 224,5                          | 383,7                        | 2,6         | 1,4 | 0 - 10,0   | 4,9           | 2,1 | 2,0- 30,0  | 0,1              | 15,5              | 16,3                         | 29         |
| 16 | Begur                | 1051    | 38,4                           | 53,0                         | 3,0         | 1,7 | 0 - 10,0   | 4,9           | 1,5 | 2,0 - 20,0 | 0,1              | 14,9              | 0,6                          | 29         |
| 17 | Plane Exterior       | 266     | 466,9                          | 476,0                        | 2,3         | 1,2 | 0,2-7,0    | -             | -   | -          | 0,0              | -                 | 0,0                          | 12         |
| 18 | Plane Interior       | 279     | 489,0                          | 1382,2                       | 3,9         | 0,2 | 0,3-9,5    | -             | -   | -          | 0,0              | -                 | 0,0                          | 12         |
| 19 | Figuier Interior     | 166     | 290,4                          | 271,7                        | 2,2         | 1,3 | 0,1-6,0    | -             | -   | -          | 0,0              | -                 | 0,0                          | 12         |
| 20 | Grotte Pèrès         | 175     | 665,0                          | 528,9                        | 2,0         | 1,1 | 0,5-5,2    | -             | -   | -          | 0,0              | -                 | 0,0                          | 33         |
| 21 | Maire                | 150     | 540,0                          | 683,4                        | 2,6         | 1,2 | 0,6-6,4    | -             | -   | -          | 0,0              | -                 | 0,0                          | 33         |
| 22 | Massa d'oros         | NA      | 45,0                           | 170,7                        | 4,9         | 1,7 | 1,8 - 7,9  | 6,0           | 2,0 | 3,0 - 14,0 | 0,0              | 21,9              | 0,0                          | 5          |
| 23 | Isuela Sud           | NA      | 225,0                          | 2390,4                       | 6,3         | 0,3 | -          | 8,2           | 0,7 | -          | -                | -                 | -                            | 32         |
| 24 | Cala Oro Est         | NA      | 375,6                          | 3172,5                       | 8,6         | 1,3 | -          | 12,1          | 1,8 | -          | -                | -                 | -                            | 32         |
| 25 | Torreta              | NA      | 150,0                          | 772,5                        | 6,9         | 0,8 | -          | 9,5           | 0,1 | -          | -                | -                 | -                            | 32         |
| 26 | Dragone              | NA      | 175,0                          | 1105,0                       | 6           | 0,4 | -          | 7,2           | 0,9 | -          | -                | -                 | -                            | 32         |
| 27 | Targa Gonzatti       | NA      | 168,3                          | 1005,0                       | 6,9         | 0,4 | -          | 7,0           | 0,9 | -          | -                | -                 | -                            | 32         |
| 28 | Diamante             | NA      | 300,0                          | 1402,5                       | 5,8         | 0,6 | -          | 10,1          | 1,3 | -          | -                | -                 | -                            | 32         |
| 29 | Altare               | NA      | 205,0                          | 1040,0                       | 5           | 0,5 | -          | 7,8           | 0,8 | -          | -                | -                 | -                            | 32         |
| 30 | Punta Vessinaro      | NA      | 135,0                          | 816,6                        | 5,1         | 0,4 | -          | 6,2           | 0,8 | -          | -                | -                 | -                            | 32         |
| 31 | Casa del Sindaco     | NA      | 153,7                          | 1192,5                       | 6,1         | 0,3 | -          | 12,1          | 1,7 | -          | -                | -                 | -                            | 32         |
| 32 | San Giorgio          | NA      | 181,2                          | 826,2                        | 6,2         | 0,4 | -          | 9,6           | 1,2 | -          | -                | -                 | -                            | 32         |
| 33 | San Giorgio Est      | NA      | 225,6                          | 225,6                        | 4,6         | 0,3 | -          | 8,4           | 1,1 | -          | -                | -                 | -                            | 32         |
| 34 | Faro cape            | NA      | 425,0                          | 1415,0                       | 4,6         | 0,5 | -          | 6,9           | 0,5 | -          | -                | -                 | -                            | 32         |

| ID | Population           | Location       | Area          | Country | Latitude | Longitude | Depth range (m) | Sampling year | Habitat       | Protection level | Year of protection |
|----|----------------------|----------------|---------------|---------|----------|-----------|-----------------|---------------|---------------|------------------|--------------------|
| 1  | Cave b               | Scandola       | W Corsica     | France  | 42.3597  | 8.5575    | 22-24           | 2011          | Cave-overhang | MPA              | 1975               |
| 2  | Portofino            | Portofino      | Ligurian Sea  | Italy   | 44.3030  | 9.2138    | 30-35           | 2009          | NA            | MPA              | 1999               |
| 3  | Banyuls              | Banyuls        | Gulf of Lions | France  | 42.4833  | 3.1305    | 23-25           | 2005          | Overhang      | MPA              | 1974               |
| 4  | Carry-le-Rouet       | Carry-le-Rouet | Gulf of Lions | France  | 43.3241  | 5.1619    | 24-25           | 2005          | Overhang      | MPA              | 1983               |
| 5  | Palazzu              | Scandola       | Corsica       | France  | 42.4097  | 8.6075    | 19-22           | 2003          | Cave          | MPA              | 1975               |
| 6  | Cap de Creus         | Cap de Creus   | Catalan Sea   | Spain   | 42.4868  | 3.5030    | 30-35           | 2009          | NA            | MPA              | 1998               |
| 7  | Medes shallow        | Medes-Montgri  | Catalan Sea   | Spain   | 42.0467  | 3.2273    | 15-49           | 2002-03       | NA            | MPA              | 1983               |
| 8  | Tres Frares          | Cap de Creus   | Catalan Sea   | Spain   | 42.3393  | 3.3019    | 70-80           | 2003          | Boulders      | MPA              | 1998               |
| 9  | Figuier Exterior     | Marsella       | Provence      | France  | 43.2051  | 5.4469    | 17              | 1999-2000     | Overhang      | Unprotected*     |                    |
| 10 | Pedres Barra Massina | Cap de Creus   | Catalan Sea   | Spain   | 42.2937  | 3.3142    | 60-73           | 2002/03       | Boulders      | MPA              | 1998               |
| 11 | Medes deep           | Medes-Montgri  | Catalan Sea   | Spain   | 42.0474  | 3.2284    | 15-49           | 2002-03       | Overhang      | MPA              | 1983               |
| 12 | Moyade Exterior      | Marsella       | Provence      | France  | 43.1770  | 5.3721    | 20-25           | 1999-2000     | Overhang      | Unprotected*     |                    |
| 13 | Calafuria            | Calafuria      | Ligurian Sea  | Italy   | 43.5000  | 10.3333   | 25-40           | 1992-97       | Steep wall    | Unprotected      |                    |
| 14 | Moyade Interior      | Marsella       | Marseille     | France  | 43.1772  | 5.3723    | 20-25           | 1999-2000     | Cave          | Unprotected*     |                    |
| 15 | Montgrí              | Medes-Montgri  | Catalan Sea   | Spain   | 42.0989  | 3.2142    | 13-32           | 2002-03       | NA            | MPA              | 1992               |
| 16 | Begur                | Begur          | Catalan Sea   | Spain   | 41.9581  | 3.2346    | 18-32           | 2002-03       | NA            | Unprotected      |                    |
| 17 | Plane Exterior       | Marsella       | Provence      | France  | 43.1865  | 5.3915    | 13-15           | 1999-2000     | Cave          | Unprotected*     |                    |
| 18 | Plane Interior       | Marsella       | Provence      | France  | 43.1866  | 5.3912    | 13-15           | 1999-2000     | Cave          | Unprotected*     |                    |
| 19 | Figuier Interior     | Marsella       | Provence      | France  | 43.2052  | 5.4469    | 10-15           | 1999-2000     | Cave          | Unprotected*     |                    |
| 20 | Grotte Pérès         | Marsella       | Provence      | France  | 43.1866  | 5.3913    | 13-15           | 2003          | Cave          | Unprotected*     |                    |
| 21 | Maire                | Marsella       | Provence      | France  | 43.2090  | 5.3372    | 15-18           | 2004          | Tunel         | Unprotected*     |                    |
| 22 | Massa d'oros         | Cap de Creus   | Catalan Sea   | Spain   | 42.3155  | 3.3337    | 50-80           | 2002/03       | Steep wall    | MPA              | 1998               |
| 23 | Isuela Sud           | Portofino      | Ligurian Sea  | Italy   | 44.3814  | 9.3194    | 25-40           | 2012          | Steep wall    | MPA              | 1999               |
| 24 | Cala Oro Est         | Portofino      | Ligurian Sea  | Italy   | 44.4972  | 9.1806    | 25-40           | 2012          | Steep wall    | MPA              | 1999               |
| 25 | Torreta              | Portofino      | Ligurian Sea  | Italy   | 44.5094  | 9.1822    | 25-40           | 2012          | Steep wall    | MPA              | 1999               |
| 26 | Dragone              | Portofino      | Ligurian Sea  | Italy   | 44.4936  | 9.3181    | 25-40           | 2012          | Steep wall    | MPA              | 1999               |
| 27 | Targa Gonzatti       | Portofino      | Ligurian Sea  | Italy   | 44.4400  | 9.3836    | 25-40           | 2012          | Steep wall    | MPA              | 1999               |
| 28 | Diamante             | Portofino      | Ligurian Sea  | Italy   | 44.4353  | 9.2144    | 25-40           | 2012          | Steep wall    | MPA              | 1999               |
| 29 | Altare               | Portofino      | Ligurian Sea  | Italy   | 44.3917  | 9.4067    | 25-40           | 2012          | Steep wall    | MPA              | 1999               |
| 30 | Punta Vessinaro      | Portofino      | Ligurian Sea  | Italy   | 44.3703  | 9.4336    | 25-40           | 2012          | Steep wall    | MPA              | 1999               |
| 31 | Casa del Sindaco     | Portofino      | Ligurian Sea  | Italy   | 44.3494  | 9.2497    | 25-40           | 2012          | Steep wall    | MPA              | 1999               |
| 32 | San Giorgio          | Portofino      | Ligurian Sea  | Italy   | 44.3103  | 9.3853    | 25-40           | 2012          | Steep wall    | MPA              | 1999               |
| 33 | San Giorgio Est      | Portofino      | Ligurian Sea  | Italy   | 44.3972  | 9.2181    | 25-40           | 2012          | Steep wall    | MPA              | 1999               |
| 34 | Faro cape            | Portofino      | Ligurian Sea  | Italy   | 44.5461  | 9.2550    | 25-40           | 2012          | Steep wall    | MPA              | 1999               |

\* This area has been declared protected in 2012

Supplementary table 2
